# Supplementary material
Source: Springer Nature journal article supplement (https://cris.unibo.it/retrieve/b8b921a5-f06e-46a4-9d5e-e7c1e1811bbc/41997_2022_652_MOESM3_ESM.docx)
Supplement: MOESM3 [file 41997_2022_652_MOESM3_ESM.docx]

**Appendix B. Supplementary File**

Figure 2S Quality assessment in accordance with the STROBE

|  | Schmidt et al. 2020 |
| --- | --- |
| Title /abstract | 2 |
| Background | 1 |
| Objective | 1 |
| Setting | 1 |
| Study design | 1 |
| Participants | 1 |
| Variables | 1 |
| Data sources | 1 |
| Bias | 0 |
| Study size | 1 |
| Quantitative variables | 1 |
| Statistical method | 3 |
| Results participants | 3 |
| Descriptive data | 2 |
| Outcome data | 1 |
| Main results | 2 |
| Other analyses | 0 |
| Discussion key results | 1 |
| Limitation | 1 |
| Interpretation | 1 |
| Generalizability | 1 |
| Funding | 1 |
| Total | 27= Good |
| Results | 0-14 as poor quality, 15-25 as intermediate quality and 26-33 as good quality of the study. |
